# Supplementary material for: Effect of modulation of PPAR-γ activity on Kupffer cells M1/M2 polarization in the development of non-alcoholic fatty liver disease
Source: PubMed Central journal article supplement (PMC5353732; doi:10.1038/srep44612), 2017-03-16
Supplement: srep44612-s1.pdf [file srep44612-s1.pdf]

## Effect of modulation of PPAR- $\gamma$ activity on Kupffer cells M1/M2 polarization in the development of non-alcoholic fatty liver disease

Wenjing Luo<sup>\*</sup>, Qinyu Xu<sup>\*</sup>, Qi Wang<sup>\*</sup>, Huimin Wu, Jing HUA<sup>#</sup>

Division of Gastroenterology and Hepatology; Key Laboratory of Gastroenterology and Hepatology, Ministry of Health; Renji Hospital, School of Medicine, Shanghai Jiao Tong University; Shanghai Institute of Digestive Disease; 145 Middle Shandong Road, Shanghai 200001, China

### Suppl. Fig

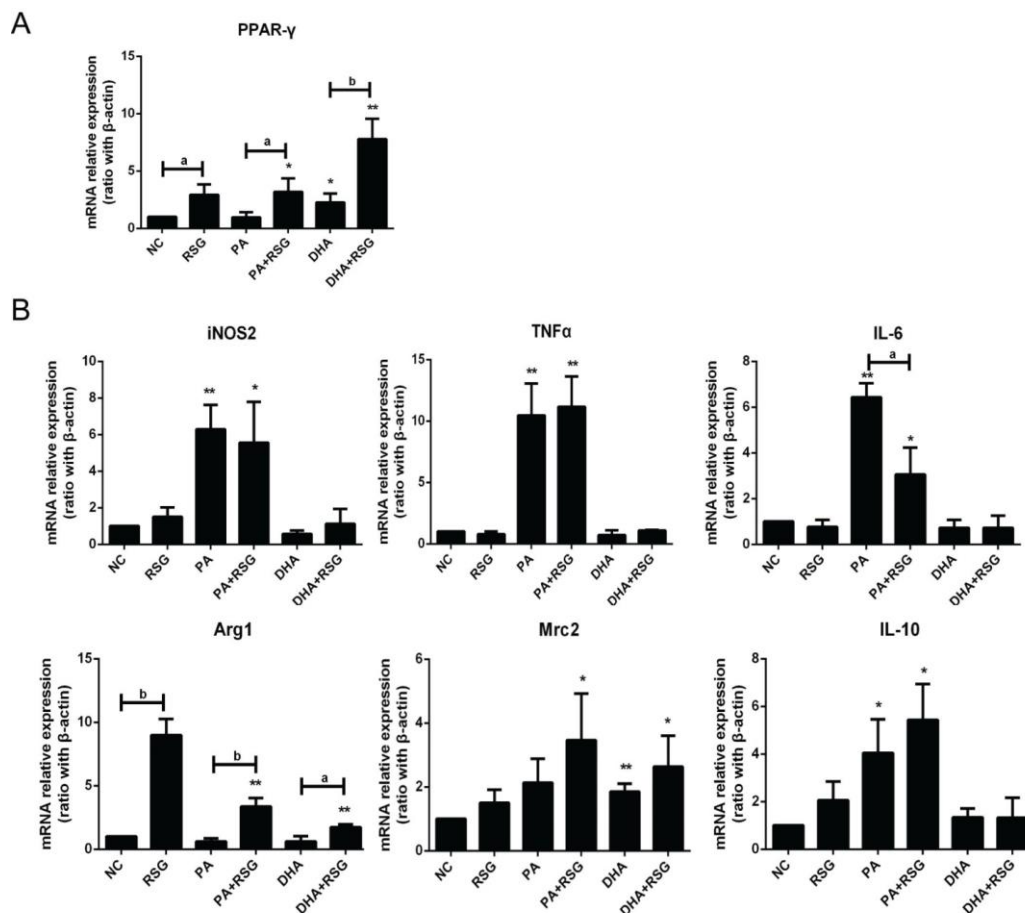

### Rosiglitazone on PPAR- $\gamma$ expression and macrophages M1/M2 polarization

RAW264.7 macrophages were pre-incubated with rosiglitazone (RSG, 20  $\mu$ mol/L) for 3h, followed by combined treatment with either PA (0.5mmol/L) or DHA (50  $\mu$ mol/L) for 6h. Total RNA was extracted from treated RAW264.7 macrophages. (A) PPAR- $\gamma$  mRNA expression on macrophages, (B) Effect of rosiglitazone treatment on macrophages M1/ M phenotype. Values are mean  $\pm$  SEM, \*  $P < 0.05$ , \*\*  $P < 0.01$  versus

normal control (NC); <sup>a</sup> $P < 0.05$ , <sup>b</sup> $P < 0.01$  comparison of the designated two groups,  
n=3 experiments.
